# Supplementary material for: Type I Cystatin Derived from Cysticercus pisiformis—Stefins, Suppresses LPS-Mediated Inflammatory Response in RAW264.7 Cells
Source: MDPI journal article supplement (doi:10.3390/microorganisms12050850), 2024-04-24
Supplement: s1 [file s1]

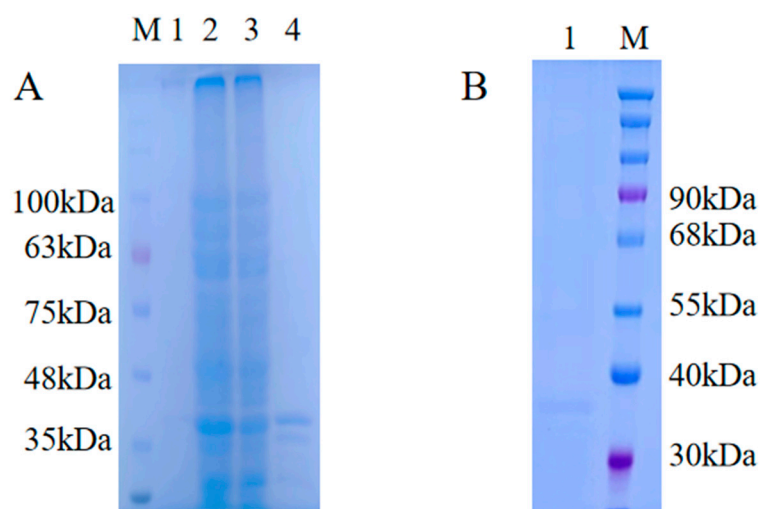

**Figure S1.** Expression and purification of recombinant CpStefin protein. **A.** The expression of recombinant CpStefin protein. M: protein Marker; 1: uninduced control; 2: total supernatant protein after IPTG induction; 3: total protein of whole liquid after IPTG induction; 4: total protein of precipitation after IPTG induction. **B.** The purification of recombinant CpStefin protein. M: protein Marker; 1: purified CpStefin recombinant protein.
